# Supplementary material for: Pfs230 yields higher malaria transmission–blocking vaccine activity than Pfs25 in humans but not mice
Source: JCI journal article supplement (doi:10.1172/jci146221), 2021-02-09
Supplement: sd1 [file 1]

1  
2  
3  
4  
5  
6  
7  
8  
9  
10  
11  
12  
13  
14  
15  
16  
17  
18  
19  
20  
21  
22  
23

## Supplementary Materials for

### **Pfs230 yields higher malaria transmission-blocking vaccine activity than Pfs25 in humans but not mice**

Sara A. Healy<sup>1</sup>, Charles Anderson<sup>1</sup>, Bruce J. Swihart<sup>2</sup>, Agnes Mwakingwe<sup>1</sup>, Erin E. Gabriel<sup>2,3</sup>, Hope Decederfelt<sup>4</sup>, Charlotte V. Hobbs<sup>1</sup>, Kelly M. Rausch<sup>1</sup>, Daming Zhu<sup>1</sup>, Olga Muratova<sup>1</sup>, Raul Herrera<sup>1</sup>, Puthupparampil V. Scaria<sup>1</sup>, Nicholas J. MacDonald<sup>1</sup>, Lynn E. Lambert<sup>1</sup>, Irfan Zaidi<sup>1</sup>, Camila H. Coelho<sup>1</sup>, Jonathan P. Renn<sup>1</sup>, Yimin Wu<sup>1&</sup>, David L. Narum<sup>1</sup>, Patrick E. Duffy<sup>1\*</sup>

Correspondence to: [patrick.duffy@nih.gov](mailto:patrick.duffy@nih.gov)

#### **This PDF file includes:**

- Human Study Objectives and Design**
- Supplementary Figures S1-S7**
- Supplementary Tables S1-S9**

## 24 **Human Study Objectives and Design**

### 25 Human Study Objective

26 The primary objective of the study was to assess the safety and immunogenicity of Pfs30D1-  
27 EPA/Alhydrogel<sup>®</sup> and Pfs25M-EPA/Alhydrogel<sup>®</sup> given alone or in combination by co-  
28 administration in healthy, malaria naïve US adults. Solicited adverse events (AEs) and  
29 unsolicited AEs were recorded through Day 14 after each vaccination. Injection site reactions  
30 were assessed until Day 7 after vaccination or until resolved. After that period unsolicited AEs,  
31 SAEs, UPs, and NOCIs were recorded. Secondary objectives were to determine functional  
32 antibody responses to the Pfs25 and Pfs230 proteins as measured by standard membrane feeding  
33 assays (SMFA). ELISA assays were evaluated on day vaccination as well as 14 days post-dose 1  
34 and dose 2 and then on 56 post-dose 2. SMFA was evaluated on day 14 post-dose 2.

### 36 Participants

37 Non-pregnant, healthy malaria-naïve US adults age 18-50 years old were recruited from  
38 the Bethesda, Maryland area and were screened for the absence of significant medical  
39 conditions. Exclusion criteria included prior history of malaria infection in last 10 years, prior  
40 travel to a malaria transmission area in the last 5 years or planned travel during the course of the  
41 study, and previous receipt of an investigational malaria vaccine in the last 5 years. Participants  
42 were also required to be negative for human immunodeficiency virus, hepatitis B, and hepatitis  
43 C, as well as to have clinically normal hematological and biochemistry values. Study enrollment  
44 by group is shown in **Table S8**, and the demographic summary of participants is shown in **Table**  
45 **S9**.

### 47 Interventions

48 PpPfs25M is a *Pichia*-expressed recombinant Pfs25 with a molecular mass of 18,713  
49 Daltons in an oxidized state. EcEPA is an *E. coli*-expressed recombinant protein with molecular  
50 mass of 66,975 Daltons. The Pfs25M-EPA conjugate was produced by reaction between  
51 thiolated PpPfs25M and maleimide-activated EcEPA, followed by purification using size-  
52 exclusion chromatography. Pfs25M-EPA was subsequently formulated with Alhydrogel<sup>®</sup>, an  
53 aluminum hydroxide gel (Frederikssund, Denmark) used extensively as an adjuvant in licensed  
54 human vaccines. The Pfs25M-EPA/Alhydrogel<sup>®</sup> vaccine was provided as a single-use vial. A  
55 0.2-mL volume is administered for delivery of 16 µg conjugated Pfs25M, 16 µg conjugated  
56 EPA, and 320 µg Alhydrogel<sup>®</sup>. A 0.6-mL volume is administered for delivery of 47 µg  
57 conjugated Pfs25M, 47 µg conjugated EPA, and 960 µg Alhydrogel<sup>®</sup>. Of note, Pfs25M differed  
58 from Pfs25H tested in earlier clinical trials (16, 17) by elimination of the His-tag previously used  
59 for purification.

60 PpPfs230D1 is a *Pichia*-expressed recombinant a sub-segment (S<sub>542</sub>-G<sub>736</sub>) of Pfs230 with  
61 a molecular mass of 21,850 Daltons in an oxidized state. The Pfs230D1-EPA conjugate was  
62 produced by reaction between thiolated PpPfs230D1 and maleimide-activated EcEPA, followed  
63 by purification using size-exclusion chromatography. The Pfs230D1-EPA/Alhydrogel<sup>®</sup> vaccine

64 was provided as a single-use vial. A 0.1-mL volume is administered for delivery of 5 µg  
65 conjugated Pfs230D1, 4.9 µg conjugated EPA, and 160 µg Alhydrogel®. A 0.3-mL volume is  
66 administered for delivery of 15 µg conjugated Pfs230D1, 14.7 µg conjugated EPA, and 480 µg  
67 Alhydrogel®. A 0.8-mL volume is administered for delivery of 40 µg conjugated Pfs230D1, 39.2  
68 µg conjugated EPA, and 1280 µg Alhydrogel®.

69 The Pfs25M, Pfs230D1, the EcEPA, the Pfs25-EPA conjugates, the Pfs230D1-EPA  
70 conjugates and the final Pfs25M-EPA/Alhydrogel® and Pfs230D1-EPA/Alhydrogel® vaccines  
71 were manufactured in cGMP compliance at the Walter Reed Army Institute of Research  
72 Bioproduction Facility. The biochemical and biophysical stabilities, including recognition by  
73 confirmation-sensitive, transmission blocking monoclonal antibodies, of the conjugate Bulk  
74 Drug Substances (Pfs25M-EPA, Pfs230D1-EPA) and the Final Vial Products (Drug Products  
75 Pfs25M-EPA/Alhydrogel® and Pfs230D1-EPA/Alhydrogel®) were each evaluated annually. The  
76 potency of both final vaccines (Pfs25M-EPA/Alhydrogel® and Pfs230D1-EPA/Alhydrogel®)  
77 were monitored semiannually during the trial until after the last vaccination. All results indicated  
78 the conjugates and formulated vaccines were stable and were in compliance with the preset  
79 specifications.

80 Vaccines were administered by intramuscular injection into the deltoid muscle. Arms  
81 were alternated with successive vaccinations if a single vaccination was given. If simultaneous  
82 vaccinations were administered, each vaccine was delivered separately in alternate arms. Shortly  
83 before vaccination, a study pharmacist withdrew the appropriate volume for the dose each  
84 participant was to receive. For Pfs25M, an injection volume of 0.2 mL (Groups 1a and 3a)  
85 delivered 16 µg Pfs25M (i.e., conjugates comprised of 16 µg Pfs25M, and 16 µg EPA, and 320  
86 µg Alhydrogel®) and an injection volume of 0.6 mL (Groups 1b and 3b) delivered 47 µg Pfs25M  
87 (conjugates comprised of 47 µg Pfs25M, 47 µg EPA, and 960 µg Alhydrogel®). For Pfs230D1,  
88 an injection volume of 0.1 mL (Group 2a) delivered 5 µg Pfs230D1 (conjugates comprised of 5  
89 µg Pfs230D1, 4.9 µg EPA, and 160 µg Alhydrogel®), an injection volume of 0.3 mL (Groups 2b  
90 and 3a) delivered 15 µg Pfs230D1 (conjugates comprised of 15 µg Pfs230D1, 14.7 µg EPA, and  
91 480 µg Alhydrogel®) and an injection volume of 0.8 mL (Groups 2c and 3b) delivered 40 µg  
92 Pfs230D1 (conjugates comprised of 40 µg Pfs230D1, 39.2 µg EPA, and 1280 µg Alhydrogel®).  
93 The sample sizes for all arms were for safety.

## 94 95 Enrollment

96 The phase 1 study of the safety and immunogenicity of Pfs230D1-EPA/Alhydrogel® and  
97 Pfs25M-EPA/Alhydrogel®, transmission-blocking vaccines against *Plasmodium falciparum*  
98 malaria, in adults in the US (NIH Clinical Center, Bethesda, Maryland) started in the US in  
99 December 2014. Study enrollment for the US portion of the study (n=35) was completed in  
100 March 2015 and last study visits per protocol were completed in September 2015 (except for the  
101 pregnancy safety follow-up which was completed in January 2016). Four study subjects didn't  
102 complete their end of study visit per protocol: 1 pregnancy was detected in Pfs25M-EPA/  
103 Alhydrogel® 16 µg arm between vaccine dose 1 and 2, she was removed per protocol and

104 followed for safety; 1 lost to follow-up post-dose 1 in the Pfs230D1-EPA/Alhydrogel<sup>®</sup> 15 µg;  
105 and 2 lost to follow-ups post-dose #2 (1 Pfs230D1-EPA/Alhydrogel<sup>®</sup> 40 µg; 1 Pfs25M-EPA/  
106 Alhydrogel<sup>®</sup> 16 µg + Pfs230D1-EPA/ Alhydrogel<sup>®</sup> 15 µg combination arm). Those that didn't  
107 complete the final study visit, but received 2 doses of vaccine, did have follow-up that included  
108 ELISA and SMFA collection and evaluation 14 days post-dose 2. The trial ended per protocol.

109

110 Details of enrollment and demographics are provided in **Tables S1 and S2**.

111

112

113

114

115

116

117

118

119

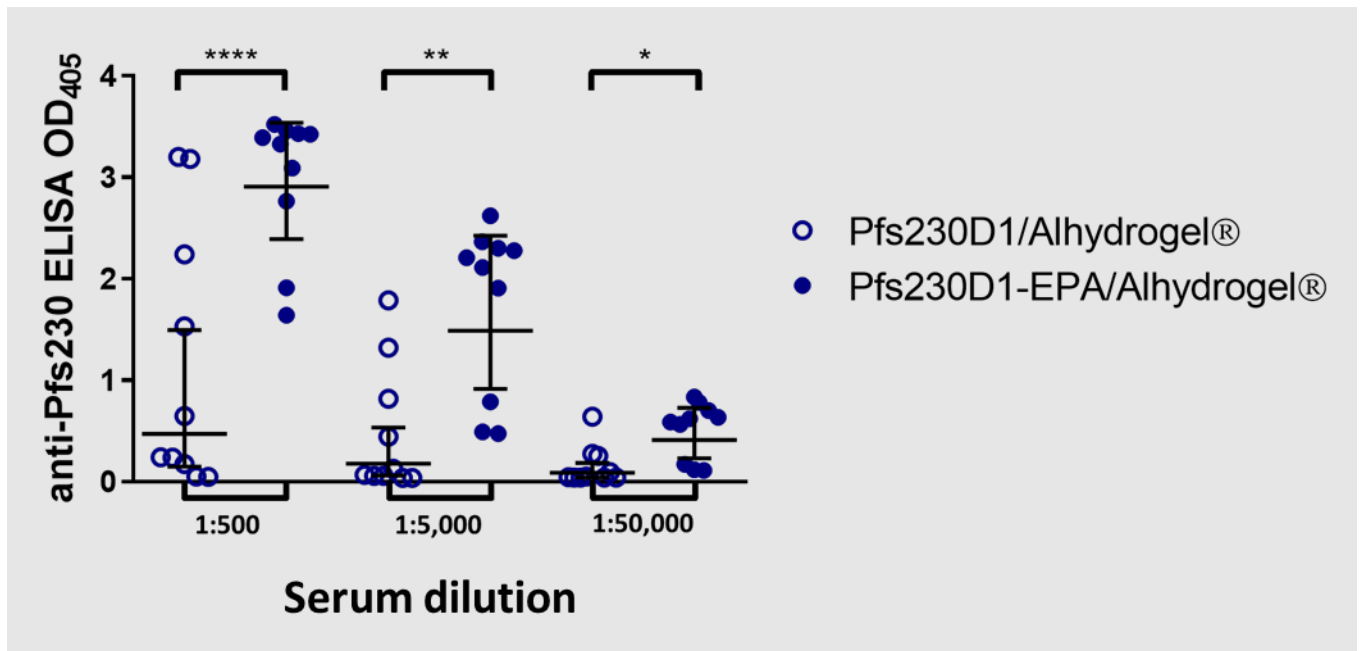

120

121 **Fig. S1. EPA enhances immunogenicity and functional activity of Pfs230D1/Alhydrogel® in**  
 122 **mice.** CD-1 mice (n=10/group) were immunized i.m. with 0.1 µg of monomeric or conjugated  
 123 Pfs230D1 on days 0 and 28. Sera were collected on day 42 for ELISA measurements of IgG  
 124 against Pfs230D1. Values are ODs at the indicated dilution of sera. \*\*\*p=0.0015; \*\*p=0.001;  
 125 \*p=0.0038 by Mann Whitney test.

126

127

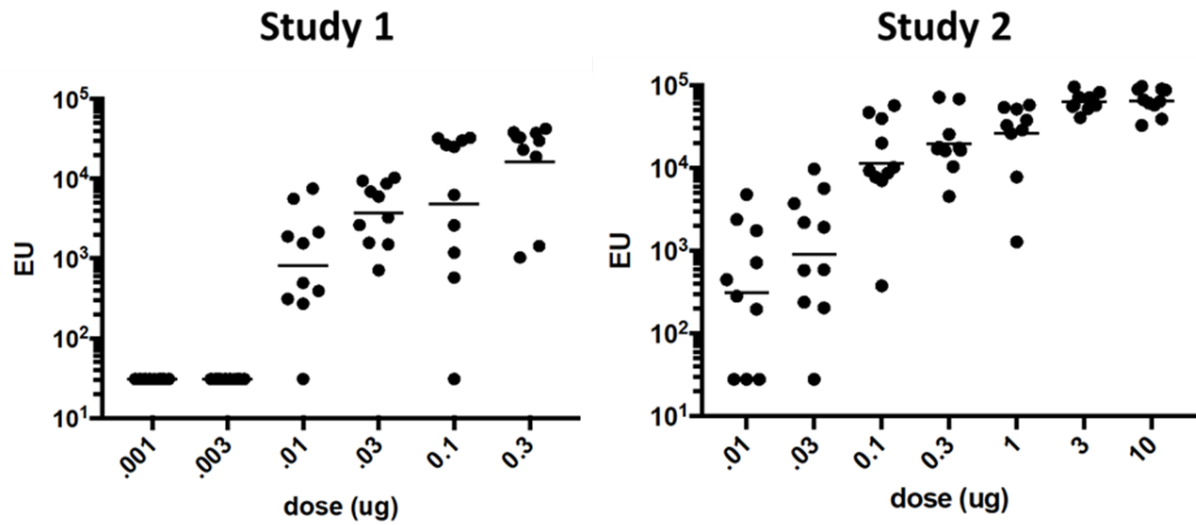

129

130 **Fig. S2. Dose-ranging studies of Pfs230D1-EPA/Alhydrogel® in mice.** BALB/c mice  
 131 (n=10/group) were immunized intraperitoneally with the indicated doses of conjugated Pfs230D1  
 132 on days 0 and 21. Sera were collected on day 35 for ELISA measurements of IgG against  
 133 Pfs230D1. EU = ELISA units.

134

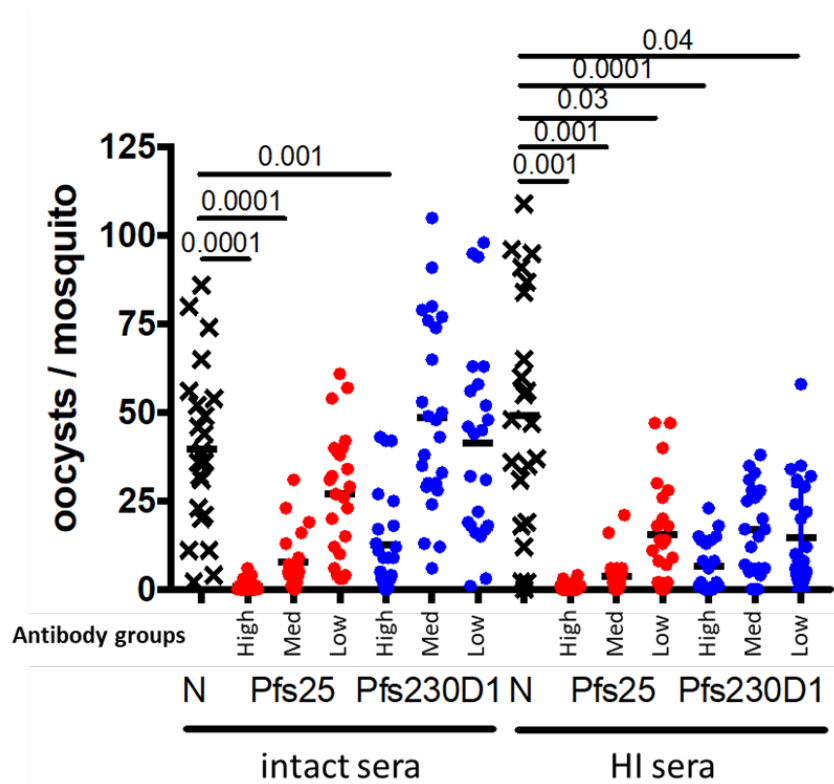

135

136 **Fig. S3. SMFA on mouse antisera revealed no superiority in functional activity of**  
 137 **Pfs230D1-EPA/Alhydrogel® over Pfs25-EPA/Alhydrogel®, in the presence or absence of**  
 138 **complement**

139 BALB/c mouse sera were collected 2 weeks after immunization with Pfs25-EPA/Alhydrogel® or  
 140 Pfs230D1-EPA/Alhydrogel® to measure antibody function by SMFA. Sera from each group  
 141 (n=10/group) were pooled and divided in two for dilution with intact (thus with complement) or  
 142 heat-inactivated human serum (thus without complement). Three dilutions of each sample were  
 143 prepared resulting in High (1:8 serum dilution), Medium (Med, 1:32), and Low (1:128) antibody  
 144 level groups indicated on the X-axis. **Table S3** provides exact antibody levels for each group. P  
 145 values are the results from Kruskal-Wallis tests with Bonferroni's correction for multiple  
 146 comparisons to the naïve control (N). The average number of oocysts in mosquitoes fed with  
 147 control human AB+ sera was 61. Figure data are also represented in **Table S3**.

148

149

150

151

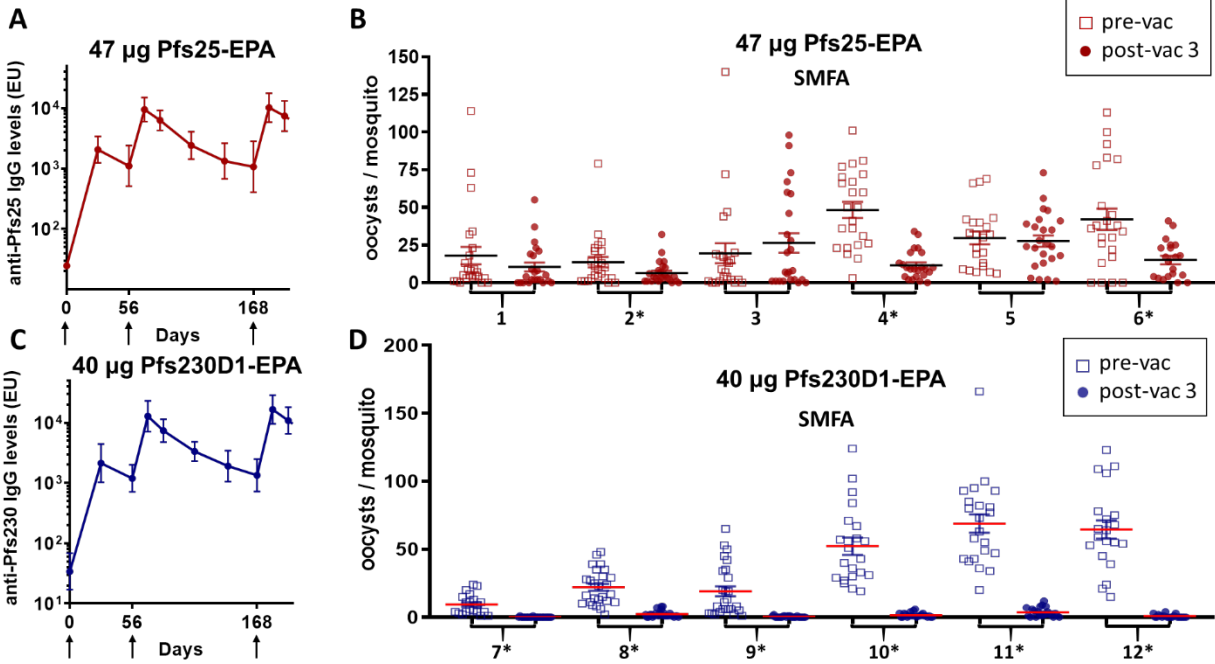

152

153 **Fig. S4. Immunogenicity and functional activity of Pfs25-EPA/Alhydrogel® versus**  
 154 **Pfs230D1-EPA/Alhydrogel® in rhesus macaques.**

155 Rhesus monkeys were immunized at 0, 2, and 6 months with Pfs25-EPA/Alhydrogel® or  
 156 Pfs230D1-EPA/Alhydrogel®. (A) and (C) show IgG levels over time (geometric mean with 95%  
 157 CI). (B) and (D) show SMFA results from individual rhesus sera samples collected 2 weeks after  
 158 the third vaccine dose; oocyst counts in negative controls (human AB<sup>+</sup> sera) ranged from 16-64.  
 159 60 µL of serum from each animal was diluted with 100 µL of AB<sup>+</sup> human sera, mixed with 100  
 160 µL gametocyte culture, and fed to mosquitos. Oocysts were measured 8 days later. Each post-  
 161 vaccination sample was tested against the pre-vaccine sample, and samples from both vaccine  
 162 groups were tested side-by-side. Each data point in (B) and (D) represents the oocyst burden  
 163 from one mosquito. Figure data are also represented in **Table S4**.

164



### Rhesus: Anti-Pfs230 antibody isotypes

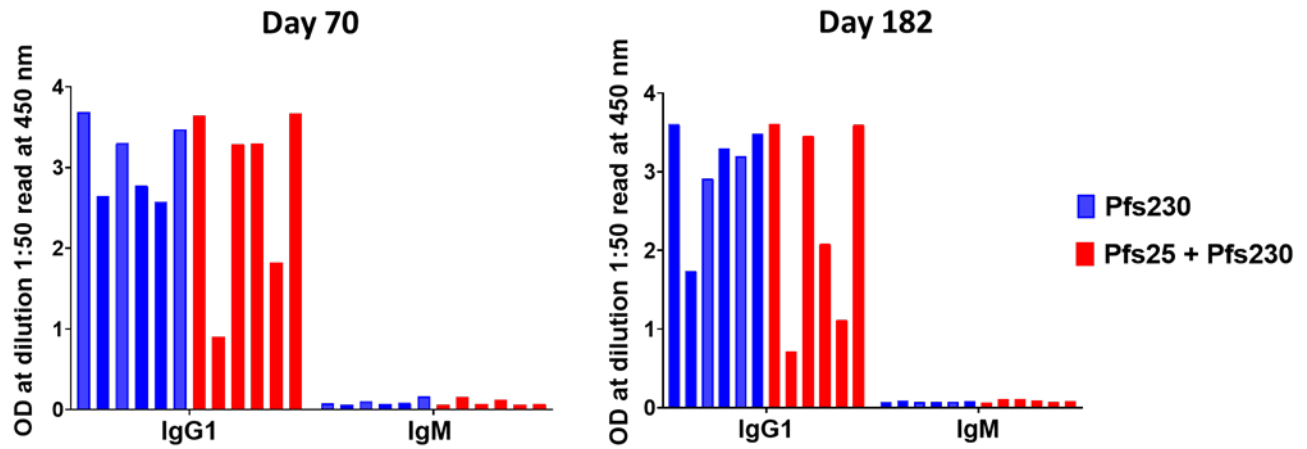

165

166 **Fig. S5. Isotyping of antibodies in sera from rhesus macaques that received either**  
167 **Pfs230D1-EPA/Alhydrogel® alone (n=6) or Pfs25-EPA/Alhydrogel® + Pfs230D1-**  
168 **EPA/Alhydrogel® combination (n=6).**

169 Antibody isotyping was performed on immune sera collected 2 weeks after the second (day 70)  
170 and third (day 182) vaccination dose by ELISA. OD values for IgG1 and IgM ELISA assays are  
171 displayed for each individual animal that received either Pfs230D1-EPA/Alhydrogel® alone  
172 (Blue bars) or Pfs25-EPA/Alhydrogel® + Pfs230D1-EPA/Alhydrogel® combination (red bars).

173

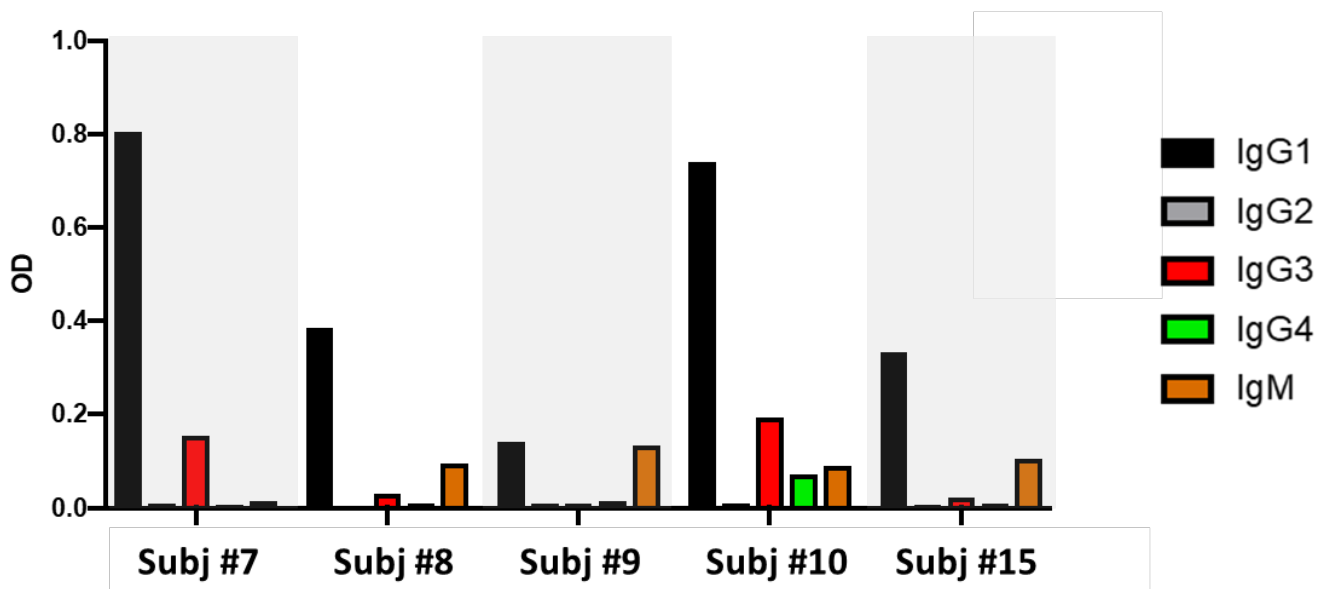

174  
175

176 **Fig. S6. Isotyping of Pfs230D1-specific antibodies in sera from five US vaccinees with high**  
177 **antibody levels against Pfs230.**

178 ELISAs were performed on sera collected 2 weeks after the second vaccination. For each  
179 participant, individual ELISA OD values for IgG1, IgG2, IgG3, IgG4 and IgM are displayed.  
180 Subject #7 (anti-Pfs230D1 = 761 EU), 8 (anti-Pfs230D1 = 204 EU), 9 (anti-Pfs230D1 = 77 EU),  
181 10 (anti-Pfs230D1 = 512 EU) = Pfs230D1-EPA/Alhydrogel® alone arm; Subject #15 (anti-  
182 Pfs230D1 = 198 EU) = Pfs25-EPA/Alhydrogel® + Pfs230D1-EPA/Alhydrogel® combination  
183 arm; Subj = subjects.

184  
185

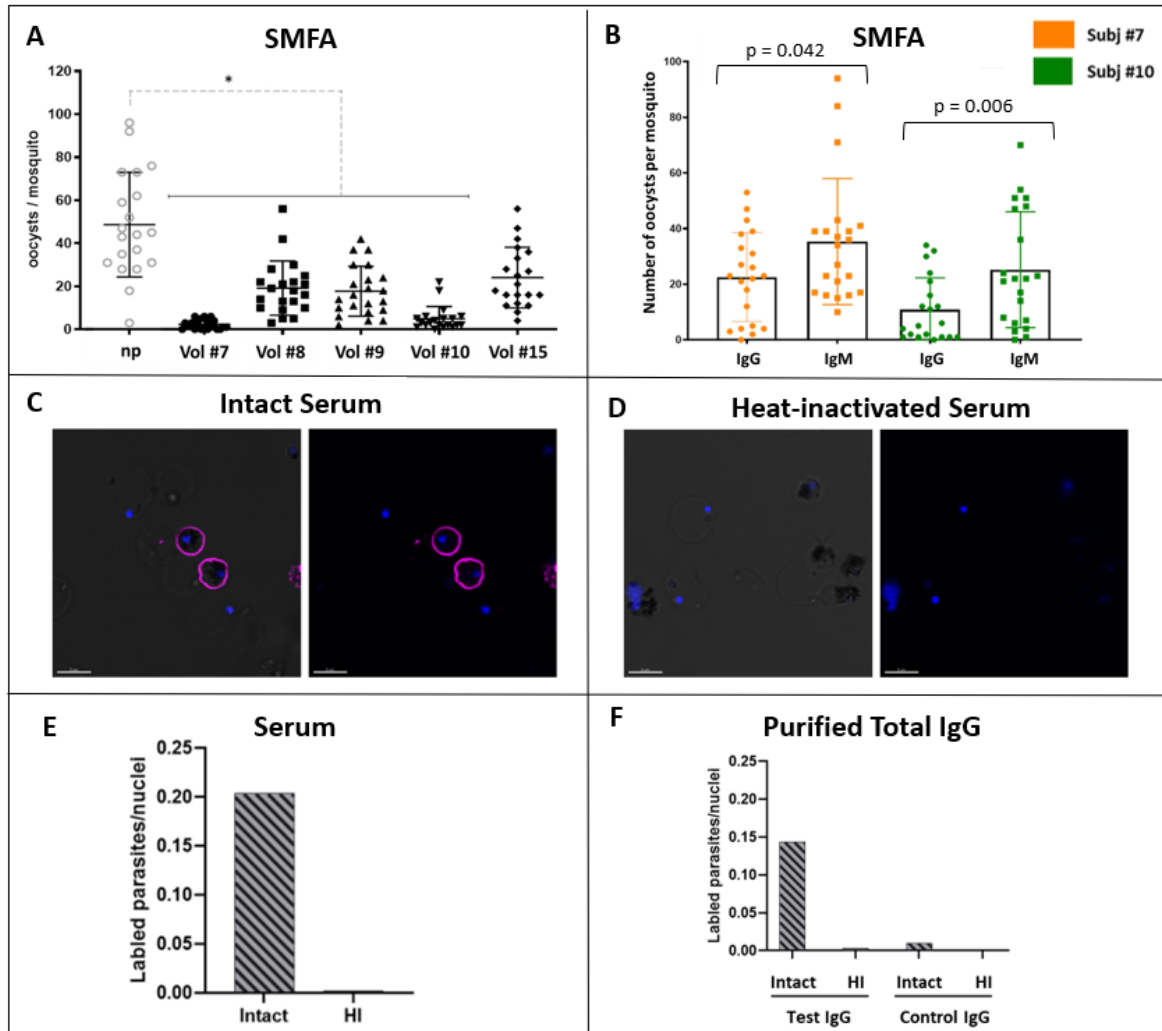

186

187 **Fig. S7. Functional activity of serum and purified IgG eight weeks post-vaccination (Day**  
 188 **84) including serum TRA and membrane attack complex formation on the parasite**  
 189 **surface.**

190 (A) Sera collected 8 weeks post-second vaccination (Day 84) were analyzed by SMFA for 5  
 191 vaccinees with high TRA on Day 56. Differences between vaccinee sera and naïve pooled sera  
 192 (“np”) were analyzed by Kruskal-Wallis tests with Bonferroni correction for multiple  
 193 comparisons; \* indicates p value < 0.05. (B) IgG and IgM purified from Day 84 antisera of  
 194 Subjects #7 and #10 were analyzed at neat concentration for comparative functional activity by  
 195 SMFA, in the presence of intact non-immune sera. Differences between IgG and IgM were  
 196 analyzed by a two sample Student’s T test; p values for comparison within each subject are  
 197 indicated in graph; when both subjects were combined, p = 0.001. Live IFA images captured by  
 198 confocal microscopy of *P. falciparum* strain NF54 gametes incubated with intact (C) or heat-  
 199 inactivated serum (D) from Subject #7 showing surface-deposited MAC (membrane attack  
 200 complex) in presence of intact but not heat-inactivated serum. MAC was detected with Alexa  
 201 488-labeled antibody that recognizes the assembled MAC complex. Cell nuclei were labeled

202 with Hoechst stain to differentiate parasites from contaminating red blood cells. The number of  
203 gametes showing MAC formation were quantified as a fraction of the total number of Hoechst-  
204 stained nuclei. MAC deposition was observed when gametes were incubated with either intact  
205 subject serum or purified IgG supplemented with naïve serum (C, E, F) and this deposition was  
206 lost after serum was heat-inactivated (D, E, F), since the heat-labile components of the  
207 complement pathway were degraded.  
208

| mouse sera       | immunogen    | Vaccine Dose (µg/0.5 mL) | Serum dilution | anti-Pfs25 (EU) | anti-Pfs230D1 (EU) | mean oocysts/mosquito | #infected/#dissected |
|------------------|--------------|--------------------------|----------------|-----------------|--------------------|-----------------------|----------------------|
| intact           | Naïve        | n/a                      | 1:8            | --              | --                 | 39.5                  | 23/23                |
|                  | Pfs25-EPA    | 0.1                      | 1:8            | 28,293          |                    | 0.7*                  | 7/23                 |
|                  |              | 0.1                      | 1:32           | 7,073           |                    | 7.8*                  | 21/23                |
|                  |              | 0.1                      | 1:128          | 1,768           |                    | 27.1                  | 24/24                |
|                  | Pfs230D1-EPA | 0.3                      | 1:8            |                 | 4,085              | 12.5*                 | 21/24                |
|                  |              | 0.3                      | 1:32           |                 | 1,021              | 48.7                  | 24/24                |
| 0.01             |              | 1:8                      |                | 390             | 41.5               | 23/23                 |                      |
| heat-inactivated | naive        | n/a                      | 1:8            | --              | --                 | 49.3                  | 21/22                |
|                  | Pfs25-EPA    | 0.1                      | 1:8            | 28,293          |                    | 0.8*                  | 9/24                 |
|                  |              | 0.1                      | 1:32           | 7,073           |                    | 3.8*                  | 17/24                |
|                  |              | 0.1                      | 1:128          | 1,768           |                    | 15.5*                 | 20/23                |
|                  | Pfs230D1-EPA | 0.3                      | 1:8            |                 | 4,085              | 6.6*                  | 18/22                |
|                  |              | 0.3                      | 1:32           |                 | 1,021              | 16.8                  | 20/23                |
| 0.01             |              | 1:8                      |                | 390             | 14.5*              | 25/25                 |                      |

209 \*p<0.05 by Kruskal-Wallis with Dunn's correction for multiple comparisons, when comparing  
210 post-vaccine to naïve sera  
211

212 **Table S1: Sera from BALB/c mice immunized with Pfs25-EPA/Alhydrogel or Pfs230D1-**  
213 **EPA/Alhydrogel block infection in the presence or absence of complement.**

214 Antibody levels by ELISA (anti-Pfs25; anti-Pfs230D1) and antibody function by SMFA are  
215 shown for sera taken before ("naïve") and after 2 vaccine doses. Three dilutions of sera from  
216 each group were used to titrate the activity. Antibody levels shown are the amount of IgG in the  
217 mosquito feeder after dilution. EU = ELISA units. The average number of oocysts in mosquitoes  
218 fed with control human AB+ sera was 61. Table data are also represented in **Figure S3**.

219

| Vaccine Group     | Animal | IgG levels in feeder (EU) |          | mean oocysts/mosquito |             | % TRA | Infected/Dissected |       | % TBA |
|-------------------|--------|---------------------------|----------|-----------------------|-------------|-------|--------------------|-------|-------|
|                   |        | Pfs25                     | Pfs230D1 | Pre (D0)              | Post (D182) |       | pre                | post  |       |
| Pfs25-EPA/alum    | 1      | 3,562                     |          | 18.1                  | 10.5        | 42    | 21/24              | 17/23 | 16    |
|                   | 2      | 4,194                     |          | 13.7                  | 6.4*        | 53    | 22/24              | 22/24 | 0     |
|                   | 3      | 1,745                     |          | 19.5                  | 26.4        | -35   | 19/23              | 22/24 | -11   |
|                   | 4      | 8,854                     |          | 48.3                  | 11.6*       | 76    | 23/23              | 22/23 | 4     |
|                   | 5      | 4,186                     |          | 29.7                  | 27.7        | 7     | 22/22              | 24/24 | 0     |
|                   | 6      | 3,210                     |          | 42.1                  | 15.2*       | 64    | 19/23              | 18/20 | -9    |
| Pfs230D1-EPA/alum | 7      |                           | 13,499   | 9.4                   | 0.1*        | 99    | 20/20              | 2/26  | 92    |
|                   | 8      |                           | 4,123    | 22.0                  | 2.2*        | 90    | 26/26              | 21/26 | 19    |
|                   | 9      |                           | 7,249    | 19.0                  | 0.4*        | 98    | 26/26              | 8/25  | 68    |
|                   | 10     |                           | 4,601    | 52.2                  | 1.6*        | 97    | 21/21              | 15/22 | 32    |
|                   | 11     |                           | 3,449    | 68.4                  | 3.6*        | 95    | 22/22              | 18/22 | 18    |
|                   | 12     |                           | 8,916    | 64.4                  | 0.8*        | 99    | 20/20              | 7/20  | 65    |

220 \*p<0.05 by Wilcoxon matched-pairs signed rank test, comparing D0 to D182

221

222 **Table S2: Rhesus anti-Pfs230D1 inhibits parasite transmission better than anti-Pfs25.**

223 Rhesus sera from 2 weeks after the 3rd vaccination (D182) were tested for function by SMFA.

224 60 µL of serum from each animal was diluted with 100 µL of AB<sup>+</sup> human sera, mixed with 100

225 µL gametocyte culture, and fed to mosquitos. Oocysts were measured 8 days later. Antibody

226 levels shown are the amount of IgG in the mosquito feeder after diluting. EU = ELISA units.

227 Transmission-reducing activity (%TRA) and transmission-blocking activity (%TBA) are relative

228 to the pre-vaccination sera from the same animal. The average oocyst counts in negative controls

229 (human AB<sup>+</sup> sera) ranged from 16-64. Table data are also represented in **Fig. S4**.

230

| Animal         | Intact sera           |       |                    |       | Heat-inactivated sera |       |                    |       |
|----------------|-----------------------|-------|--------------------|-------|-----------------------|-------|--------------------|-------|
|                | mean oocysts/mosquito | % TRA | infected/dissected | % TBA | mean oocysts/mosquito | % TRA | Infected/dissected | % TBA |
| Pre-bleed pool | 7.8                   |       | 22/23              |       | 5.4                   |       | 24/24              |       |
| 7              | 0.04                  | 99.5  | 1/24               | 95.7  | 1.4 *                 | 74.4  | 17/24              | 29.2  |
| 8              | 1.7                   | 78.6  | 19/24              | 17.4  | 3.0                   | 44.2  | 19/24              | 20.8  |
| 9              | 0.1                   | 98.4  | 3/24               | 87.0  | 0.5                   | 90.7  | 7/24               | 70.8  |
| 10             | 0.1                   | 98.4  | 2/24               | 91.3  | 1.5 *                 | 72.1  | 17/24              | 29.2  |
| 11             | 0.3                   | 96.8  | 4/24               | 82.6  | 2.0 *                 | 62.0  | 15/24              | 37.5  |
| 12             | 0.04                  | 99.5  | 1/24               | 95.7  | 1.3 *                 | 76.7  | 17/24              | 29.2  |

231 \*p<0.05 by Wilcoxon matched-pairs signed rank test, comparing NORM to Heat-inactivated

232 **Table S3: Rhesus anti-Pfs230D1 requires complement for optimal activity.**

233 Rhesus sera from 2 weeks after the 3rd vaccination (D182) of Pfs230D1-EPA were tested for  
234 function by SMFA. Sixty microliters (60 µL) of test sera was diluted with 100 µL of AB<sup>+</sup> human  
235 sera, intact (thus with complement) or heat-inactivated (thus without complement), mixed with  
236 100 µL gametocyte culture, and fed to mosquitos. Oocysts were measured 8 days later.  
237 Transmission-reducing activity (%TRA) and transmission-blocking activity (%TBA) are relative  
238 to the pre-bleed pools. As a group, serum TRA was significantly greater in intact versus heat-  
239 inactivated sera (P<0.05, Wilcoxon 2-tailed signed-rank test). The average oocyst counts in  
240 negative controls (human AB<sup>+</sup> sera) ranged from 16-64.

241

| Pfs25M-EPA/Alhydrogel® Alone     |              |            |            |              |             |             |
|----------------------------------|--------------|------------|------------|--------------|-------------|-------------|
|                                  | Pfs25M, 16µg |            |            | Pfs25M, 47µg |             |             |
|                                  | Vaccine 1    | Vaccine 2  | Total      | Vaccine 1    | Vaccine 2   | Total       |
|                                  | N=5          | N=4        | N=5        | N=5          | N=5         | N=5         |
| Total # AEs                      | 17 (3) 60%   | 10 (2) 50% | 27 (4) 80% | 11 (5) 100%  | 13 (5) 100% | 24 (5) 100% |
| <b>Classification</b>            |              |            |            |              |             |             |
| Local Reactogenicity             | 4 (2) 40%    | 2 (2) 50%  | 6 (3) 60%  | 6 (5) 100%   | 7 (4) 80%   | 13 (5) 100% |
| Systemic Reactogenicity          | 8 (2) 40%    | 0 (0) 0%   | 8 (2) 40%  | 1 (1) 20%    | 0 (0) 0%    | 1 (1) 20%   |
| Laboratory Abnormalities         | 3 (2) 40%    | 1 (1) 25%  | 4 (3) 60%  | 2 (2) 40%    | 2 (2) 40%   | 4 (3) 60%   |
| Unsolicited AEs                  | 2 (2) 40%    | 7 (1) 25%  | 9 (3) 60%  | 2 (2) 40%    | 4 (3) 60%   | 6 (5) 100%  |
| <b>Severity and Relationship</b> |              |            |            |              |             |             |
| Grade 1                          | 13 (2) 40%   | 10 (2) 50% | 23 (4) 80% | 11 (5) 100%  | 10 (4) 80%  | 21 (5) 100% |
| <i>Pfs25 Related</i>             | 9 (2) 40%    | 2 (2) 50%  | 11 (3) 60% | 8 (5) 100%   | 6 (4) 80%   | 14 (5) 100% |
| Grade 2                          | 4 (2) 40%    | 0 (0) 0%   | 4 (2) 40%  | 0 (0) 0%     | 1 (1) 20%   | 1 (1) 20%   |
| <i>Pfs25 Related</i>             | 2 (2) 40%    | 0 (0) 0%   | 2 (2) 40%  | 0 (0) 0%     | 0 (0) 0%    | 0 (0) 0%    |
| Grade 3                          | 0 (0) 0%     | 0 (0) 0%   | 0 (0) 0%   | 0 (0) 0%     | 2 (2) 40%   | 2 (2) 40%   |
| <i>Pfs25 Related</i>             | 0 (0) 0%     | 0 (0) 0%   | 0 (0) 0%   | 0 (0) 0%     | 0 (0) 0%    | 0 (0) 0%    |
| Grade 4                          | 0 (0) 0%     | 0 (0) 0%   | 0 (0) 0%   | 0 (0) 0%     | 0 (0) 0%    | 0 (0) 0%    |
| SAE                              | 0 (0) 0%     | 0 (0) 0%   | 0 (0) 0%   | 0 (0) 0%     | 0 (0) 0%    | 0 (0) 0%    |



| <b>Pfs230D1-EPA/Alhydrogel® Alone</b> |                      |                  |                |                       |                  |                |                       |                  |                |
|---------------------------------------|----------------------|------------------|----------------|-----------------------|------------------|----------------|-----------------------|------------------|----------------|
|                                       | <b>Pfs230D1, 5µg</b> |                  |                | <b>Pfs230D1, 15µg</b> |                  |                | <b>Pfs230D1, 40µg</b> |                  |                |
|                                       | <b>Vaccine 1</b>     | <b>Vaccine 2</b> | <b>Total</b>   | <b>Vaccine 1</b>      | <b>Vaccine 2</b> | <b>Total</b>   | <b>Vaccine 1</b>      | <b>Vaccine 2</b> | <b>Total</b>   |
|                                       | N=5                  | N=5              | N=5            | N=5                   | N=4              | N=5            | N=5                   | N=5              | N=5            |
| Total # AEs                           | 8 (4) 80%            | 14 (5)<br>100%   | 22 (5)<br>100% | 10 (5)<br>100%        | 24 (4)<br>100%   | 34 (5)<br>100% | 19 (5)<br>100%        | 12 (5)<br>100%   | 31 (5)<br>100% |
| <b>Classification</b>                 |                      |                  |                |                       |                  |                |                       |                  |                |
| Local Reactogenicity                  | 2 (2) 40%            | 4 (4) 80%        | 6 (4) 80%      | 5 (4) 80%             | 4 (3) 75%        | 9 (4) 80%      | 7 (5) 100%            | 4 (4) 80%        | 11 (5)<br>100% |
| Systemic Reactogenicity               | 1 (1) 20%            | 1 (1) 20%        | 2 (2) 40%      | 3 (2) 40%             | 6 (2) 50%        | 9 (3) 60%      | 6 (3) 60%             | 0 (0) 0%         | 6 (3) 60%      |
| Laboratory Abnormalities              | 0 (0) 0%             | 2 (2) 40%        | 2 (2) 40%      | 1 (1) 20%             | 0 (0) 0%         | 1 (1) 20%      | 3 (1) 20%             | 1 (1) 20%        | 4 (2) 40%      |
| Unsolicited AEs                       | 5 (3) 60%            | 7 (2) 40%        | 12 (3) 60%     | 1 (1) 20%             | 14 (4)<br>100%   | 15 (4) 80%     | 3 (2) 40%             | 7 (5) 100%       | 10 (5)<br>100% |
| <b>Severity and Relationship</b>      |                      |                  |                |                       |                  |                |                       |                  |                |
| Grade 1                               | 6 (4) 80%            | 13 (5)<br>100%   | 19 (5)<br>100% | 10 (5)<br>100%        | 19 (4)<br>100%   | 29 (5)<br>100% | 15 (5)<br>100%        | 9 (5) 100%       | 24 (5)<br>100% |
| <i>Pfs230 Related</i>                 | 3 (3) 60%            | 6 (4) 80%        | 9 (4) 80%      | 7 (4) 80%             | 9 (3) 75%        | 16 (4) 80%     | 9 (5) 100%            | 5 (4) 80%        | 14 (5)<br>100% |
| Grade 2                               | 2 (2) 40%            | 1 (1) 20%        | 3 (3) 60%      | 0 (0) 0%              | 5 (3) 75%        | 5 (3) 60%      | 4 (2) 60%             | 3 (3) 60%        | 7 (4) 80%      |

|                       |          |          |          |          |          |          |           |          |           |
|-----------------------|----------|----------|----------|----------|----------|----------|-----------|----------|-----------|
| <i>Pfs230 Related</i> | 0 (0) 0% | 0 (0) 0% | 0 (0) 0% | 0 (0) 0% | 0 (0) 0% | 0 (0) 0% | 1 (1) 20% | 0(0) 0%  | 1 (1) 20% |
| Grade 3               | 0 (0) 0% | 0 (0) 0% | 0 (0) 0% | 0 (0) 0% | 0 (0) 0% | 0 (0) 0% | 0 (0) 0%  | 0 (0) 0% | 0 (0) 0%  |
| Grade 4               | 0 (0) 0% | 0 (0) 0% | 0 (0) 0% | 0 (0) 0% | 0 (0) 0% | 0 (0) 0% | 0 (0) 0%  | 0 (0) 0% | 0 (0) 0%  |
| SAE                   | 0 (0) 0% | 0 (0) 0% | 0 (0) 0% | 0 (0) 0% | 0 (0) 0% | 0 (0) 0% | 0 (0) 0%  | 0 (0) 0% | 0 (0) 0%  |

| <b>Pfs25M-EPA/Alhydrogel® + Pfs230D1-EPA/Alhydrogel®</b> |                                        |                  |              |                                        |                  |              |
|----------------------------------------------------------|----------------------------------------|------------------|--------------|----------------------------------------|------------------|--------------|
|                                                          | <b>Pfs25M, 16µg AND Pfs230D1, 15µg</b> |                  |              | <b>Pfs25M, 47µg AND Pfs230D1, 40µg</b> |                  |              |
|                                                          | <b>Vaccine 1</b>                       | <b>Vaccine 2</b> | <b>Total</b> | <b>Vaccine 1</b>                       | <b>Vaccine 2</b> | <b>Total</b> |
|                                                          | N=5                                    | N=5              | N=5          | N=5                                    | N=5              | N=5          |
| Total # AEs                                              | 14 (5) 100%                            | 13 (5) 100%      | 27 (5) 100%  | 23 (5) 100%                            | 21 (5) 100%      | 44 (5) 100%  |
| <b>Classification</b>                                    |                                        |                  |              |                                        |                  |              |
| Local Reactogenicity                                     | 6 (4) 80%                              | 8 (4) 80%        | 14 (4) 80%   | 9 (5) 100%                             | 11 (4) 80%       | 20 (5) 100%  |
| Systemic Reactogenicity                                  | 3 (2) 40%                              | 1 (1) 20%        | 4 (2) 40%    | 5 (2) 40%                              | 4 (1) 20%        | 9 (2) 40%    |
| Laboratory Abnormalities                                 | 2 (2) 40%                              | 2 (1) 20%        | 4 (2) 40%    | 1 (1) 20%                              | 0 (0) 0%         | 1 (1) 20%    |
| Unsolicited AEs                                          | 3 (3) 60%                              | 2 (2) 40%        | 5 (4) 80%    | 8 (4) 80%                              | 6 (2) 40%        | 14 (5) 100%  |
| <b>Severity and Relationship</b>                         |                                        |                  |              |                                        |                  |              |
| Grade 1                                                  | 14 (5) 100%                            | 13 (5) 100%      | 27 (5) 100%  | 22 (5) 100%                            | 20 (5) 100%      | 42 (5) 100%  |
| <i>Related to Pfs25</i>                                  | 4 (2) 40%                              | 4 (4) 80%        | 8 (4) 80%    | 9 (5) 100%                             | 7 (3) 60%        | 16 (5) 100%  |
| <i>Related to Pfs230</i>                                 | 6 (4) 80%                              | 4 (3) 80%        | 10 (4) 80%   | 9 (5) 100%                             | 8 (4) 80%        | 17 (5) 100%  |
| Grade 2                                                  | 0 (0) 0%                               | 0 (0) 0%         | 0 (0) 0%     | 0 (0) 0%                               | 1 (1) 20%        | 1 (1) 20%    |
| <i>Related to Pfs25</i>                                  | 0 (0) 0%                               | 0 (0) 0%         | 0 (0) 0%     | 0 (0) 0%                               | 0 (0) 0%         | 0 (0) 0%     |
| <i>Related to Pfs230</i>                                 | 0 (0) 0%                               | 0 (0) 0%         | 0 (0) 0%     | 0 (0) 0%                               | 0 (0) 0%         | 0 (0) 0%     |
| Grade 3                                                  | 0 (0) 0%                               | 0 (0) 0%         | 0 (0) 0%     | 1 (1) 20%                              | 0 (0) 0%         | 1 (1) 20%    |
| <i>Related to Pfs25</i>                                  | 0 (0) 0%                               | 0 (0) 0%         | 0 (0) 0%     | 0 (0) 0%                               | 0 (0) 0%         | 0 (0) 0%     |
| <i>Related to Pfs230</i>                                 | 0 (0) 0%                               | 0 (0) 0%         | 0 (0) 0%     | 0 (0) 0%                               | 0 (0) 0%         | 0 (0) 0%     |
| Grade 4                                                  | 0 (0) 0%                               | 0 (0) 0%         | 0 (0) 0%     | 0 (0) 0%                               | 0 (0) 0%         | 0 (0) 0%     |
| SAE                                                      | 0 (0) 0%                               | 0 (0) 0%         | 0 (0) 0%     | 0 (0) 0%                               | 0 (0) 0%         | 0 (0) 0%     |

**Table S4. Summary of adverse events from human clinical trial evaluating the safety of Pfs25M-EPA/ Alhydrogel® versus Pfs230D1-EPA/Alhydrogel® versus combination of the two.**

Local injection site reactions (including pain/tenderness, erythema/redness, swelling, induration, and pruritus) were assessed until day 7 after vaccination or until resolved. All systemic solicited reactogenicity (including fever, headache, nausea, malaise, myalgia, arthralgia, and urticaria) and unsolicited AEs were recorded through day 14 after each vaccination. Both solicited local and systemic reactogenicity were solicited from the subjects during clinic visits and with daily diary cards through day 7 post vaccination. Similar to solicited AEs, all laboratory AEs were collected and graded through 14 days after each vaccination or until resolved. X(X)X% = absolute number of AE (number of subjects experiencing AEs) percentage of subjects with AEs. SAE = serious adverse events.

| Vaccine arm              | subject | anti-Pfs25 (EU) | anti-Pfs230D1 (EU) | mean oocysts/mosquito | %TRA | infected/dissected | %TBA |
|--------------------------|---------|-----------------|--------------------|-----------------------|------|--------------------|------|
| Pfs25-EPA                | 1       | 158             |                    | 49.8                  | -24  | 23/24              | 4    |
|                          | 2       | 453             |                    | 47.8                  | -19  | 24/24              | 0    |
|                          | 3       | 686             |                    | 30.8                  | 23   | 23/24              | 4    |
|                          | 4       | 17              |                    | 52.4                  | -31  | 24/24              | 0    |
|                          | 5       | 126             |                    | 43.9                  | -10  | 24/24              | 0    |
| Pf230D1-EPA              | 6       |                 | 32                 | 52.9                  | -32  | 24/24              | 0    |
|                          | 7       |                 | 741                | 0.04 *                | 99   | 1/25***            | 96   |
|                          | 8       |                 | 204                | 16.5 *                | 59   | 21/24              | 13   |
|                          | 9       |                 | 77                 | 19.0                  | 52   | 23/24              | 4    |
|                          | 10      |                 | 512                | 0.9 *                 | 98   | 13/25***           | 48   |
| Pfs25-EPA + Pfs230D1-EPA | 11      | 17              | 23                 | 49.4                  | -23  | 24/24              | 0    |
|                          | 12      | 28              | 44                 | 59.3                  | -48  | 24/24              | 0    |
|                          | 13      | 24              | 93                 | 46.7                  | -17  | 24/24              | 0    |
|                          | 14      | 64              | 418                | 14.1 *                | 65   | 23/24              | 4    |
|                          | 15      | 122             | 198                | 4.1 *                 | 90   | 19/25**            | 24   |
| pre-bleed pool           | -       | -               | -                  | 40.0                  | -    | 24/24              | -    |

2 \* p<0.05, Kruskal-Wallis with Dunn's correction for multiple comparison; \*\*p<0.05,

3 \*\*\*p<0.001, Fisher exact test

4 **Table S5: Anti-Pfs230D1 has functional activity in humans after 2 doses.**

5 Sera collected 2 weeks after the 2nd vaccination were tested for function by SMFA. 160  $\mu$ L of  
6 sera was mixed with 100  $\mu$ L gametocyte culture and fed to mosquitos. Oocysts were measured 8  
7 days later. Transmission-reducing activity (%TRA) and transmission-blocking activity (%TBA)  
8 are relative to the pre-vaccination pool. Table data are also represented in **Fig. 3**.

|                                | subject | Intact sera           |       |       | Heat-inactivated sera |       |        |
|--------------------------------|---------|-----------------------|-------|-------|-----------------------|-------|--------|
|                                |         | mean oocysts/mosquito |       | % TRA | mean oocysts/mosquito |       | % TRA  |
|                                |         | pre-bleed             | D42   |       | pre-bleed             | D42   |        |
| Pfs230D1-EPA                   | 6       | 17.3                  | 18.0  | -4    | 12.6                  | 11.6  | 7.6    |
|                                | 7       | 12.1                  | 0 *   | 100   | 11.5                  | 5.8   | 49.5   |
|                                | 8       | 17.4                  | 6.6 * | 61.8  | 12.3                  | 10.3  | 15.9   |
|                                | 9       | 25.8                  | 6.8 * | 73.6  | 13.5                  | 17.4  | -29.4  |
|                                | 10      | 20.2                  | 0.3 * | 98.4  | 18.8                  | 5.6 * | 70.1   |
| Pfs25-EPA<br>+<br>Pfs230D1-EPA | 11      | 25.3                  | 13.7  | 45.8  | 12.9                  | 32.9  | -155.0 |
|                                | 12      | 22.5                  | 29.8  | -32.4 | 15.8                  | 31.9  | -101.9 |
|                                | 13      | 23.2                  | 23.5  | -1.6  | 27.6                  | 34.3  | -24.2  |
|                                | 14      | 11.2                  | 3.4 * | 69.9  | 12.2                  | 12.9  | -5.7   |
|                                | 15      | 20.7                  | 1.9 * | 90.7  | 17.5                  | 16.2  | 8.5    |

\*P<0.05, Wilcoxon matched-pairs signed rank test

**Table S6: Anti-Pfs230D1 requires complement for activity in humans.**

Sera from 2 weeks after the 2nd vaccination of Pfs230D1-EPA or Pfs230D1-EPA+Pfs25-EPA were tested for function by SMFA. Half of each sample was heat-treated, and 160  $\mu$ L of sera was mixed with 100  $\mu$ L gametocyte culture and fed to mosquitos. Oocysts were measured 8 days later. %TRA and %TBA are relative to the pre-vaccination sera. Table data are also represented in **Fig. 4**. The average oocyst counts in negative controls (human AB+ sera) was 14.

| <b>Target Species</b> | <b>Antibody isotype</b> | <b>Detecting antibody clone</b> | <b>Supplier</b>                   |
|-----------------------|-------------------------|---------------------------------|-----------------------------------|
| Human                 | IgG1                    | HP6069                          | Invitrogen                        |
| Human                 | IgG2                    | HP6014                          | Invitrogen                        |
| Human                 | IgG3                    | HP6047                          | Invitrogen                        |
| Human                 | IgG4                    | HP6025                          | Invitrogen                        |
| Human                 | IgM                     | HP6083                          | Invitrogen                        |
| Rhesus                | IgG1                    | 7H11                            | Nonhuman primate reagent resource |
| Rhesus                | IgG2                    | 3C10                            | Nonhuman primate reagent resource |
| Rhesus                | IgG3                    | 2G11                            | Nonhuman primate reagent resource |
| Rhesus                | IgM                     | Polyclonal                      | Jackson ImmunoResearch Inc.       |

**Table S7: Detecting antibodies used for Pfs230 isotyping assays.**

The list of detecting antibodies that were used to enumerate specific isotypes against Pfs230 in human and rhesus samples after vaccinations are displayed. 3C10 and 2G11 monoclonals for detection of IgG2 and IgG3 in rhesus could not be validated.

|                                                                        | Planned | Enrolled | Completed Study per Protocol | Discontinued |
|------------------------------------------------------------------------|---------|----------|------------------------------|--------------|
| Group 1 - (Pfs25-EPA/Alhydrogel®)                                      |         |          |                              |              |
| Arm 1a (16 µg)                                                         | 5       | 5        | 4                            | 1            |
| Arm 1b (47 µg)                                                         | 5       | 5        | 5                            | 0            |
| Group 2 - (Pfs230D1-EPA/Alhydrogel®)                                   |         |          |                              |              |
| Arm 2a (5 µg)                                                          | 5       | 5        | 5                            | 0            |
| Arm 2b (15 µg)                                                         | 5       | 5        | 4                            | 1            |
| Arm 2c (40 µg)                                                         | 5       | 5        | 4                            | 1            |
| Group 3 - (Pfs230D1-EPA/Alhydrogel® <u>and</u> Pfs25-EPA/ Alhydrogel®) |         |          |                              |              |
| Arm 3a (15 µg + 16 µg)                                                 | 5       | 5        | 4                            | 1            |
| Arm 3b (40 µg + 47 µg)                                                 | 5       | 5        | 5                            | 0            |

**Table S8: Study enrollment by group**



| Category | Sub-category         | Arm 1a:<br>Pfs25M, 16ug | Arm 2a:<br>Pfs230D1M,<br>5ug | Arm 2b:<br>Pfs230D1M,<br>15ug | Arm 3a:<br>Pfs25M, 16ug +<br>Pfs230D1M, 15ug | Overall      |
|----------|----------------------|-------------------------|------------------------------|-------------------------------|----------------------------------------------|--------------|
| GENDER   | Male                 | 1 (20.0%)               | 2 (40.0%)                    | 1 (20.0%)                     | 3 (60.0%)                                    | 7(35%)       |
|          | Female               | 4 (80.0%)               | 3 (60.0%)                    | 4 (80.0%)                     | 2 (40.0%)                                    | 13(65%)      |
| AGE      | <18                  | 0 (0.0%)                | 0 (0.0%)                     | 0 (0.0%)                      | 0 (0.0%)                                     | 0 (0.0 %)    |
|          | 18-50                | 5 (100.0%)              | 5 (100.0%)                   | 5 (100.0%)                    | 5 (100.0%)                                   | 20 (100.0 %) |
|          | >=51                 | 0 (0.0%)                | 0 (0.0%)                     | 0 (0.0%)                      | 0 (0.0%)                                     | 0 (0.0 %)    |
|          | Mean ± SD            | 44 ± 5.14               | 23.80± 1.30                  | 28.60 ± 1.51                  | 30.60± 3.34                                  | 31.75 ±8.91  |
|          | Median               | 44                      | 23                           | 29                            | 28                                           | 28.50        |
|          | Min,Max              | 36,49                   | 23,26                        | 27,30                         | 23,44                                        | 23,49        |
| Race     | Indian\Alaska Native | 0 (0.0%)                | 0 (0.0%)                     | 0 (0.0%)                      | 0 (0.0%)                                     | 0 (0.0 %)    |
|          | Asian                | 0 (0.0%)                | 0 (0.0%)                     | 0 (0.0%)                      | 0 (0.0%)                                     | 0 (0.0 %)    |
|          | Black                | 3 (60.0%)               | 0 (0.0%)                     | 2 (40.0%)                     | 0 (0.0%)                                     | 5 (25%)      |
|          | Hawaiian\Pac. Island | 0 (0.0%)                | 0 (0.0%)                     | 0 (0.0%)                      | 0 (0.0%)                                     | 0 (0.0 %)    |
|          | White                | 1 (20.0%)               | 5 (100.0%)                   | 3 (60.0%)                     | 4 (80.0%)                                    | 13 (65%)     |
|          | Multiple Race        | 1 (20.0%)               | 0 (0.0%)                     | 0 (0.0%)                      | 1 (20.0%)                                    | 2 (10 %)     |
|          | Unknown              | 0 (0.0%)                | 0 (0.0%)                     | 0 (0.0%)                      | 0 (0.0%)                                     | 0 (0.0 %)    |

**Table S9: Demographic summary of participants.**

Baseline demographic and clinical characteristics for each group of participants.
