# Supplementary material for: Pfs230 yields higher malaria transmission–blocking vaccine activity than Pfs25 in humans but not mice
Source: JCI journal article supplement (doi:10.1172/jci146221), 2021-02-09
Supplement: sd3 [file 3]

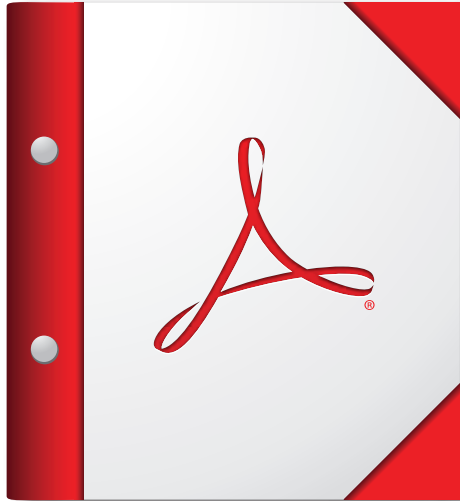

**For the best experience, open this PDF portfolio in  
Acrobat X or Adobe Reader X, or later.**

[Get Adobe Reader Now!](#)
